# Supplementary material
Source: PubMed Central journal article supplement (PMC7059107)
Supplement: jamaotolaryngolheadnecksurg-146-414-s001.pdf [file jamaotolaryngolheadnecksurg-146-414-s001.pdf]

## Supplementary Online Content

Kim SY, Kim MB, Chung W-h, Cho Y-S, Hong SH, Moon IJ. Evaluating reasons for revision surgery and device failure rates in patients who underwent cochlear implantation surgery. *JAMA Otolaryngology–Head and Neck Surgery*. Published March 5, 2020. doi:10.1001/jamaoto.2020.0030

**eTable.** Cause of revision surgery over time. Device failure showed double peak in 2005 and 2011. Flap related problem had tendency to occur at earlier period.

This supplementary material has been provided by the authors to give readers additional information about their work.

**eTable. Cause of revision surgery over time. Device failure showed double peak in 2005 and 2011. Flap related problem had tendency to occur at earlier period.**

| Year of primary surgery | 2001 | 2002 | 2003 | 2004 | 2005 | 2006 | 2007 | 2008 | 2009 | 2010 | 2011 | 2012 | 2013 | 2014 | 2015 | 2016~ |
|-------------------------|------|------|------|------|------|------|------|------|------|------|------|------|------|------|------|-------|
| Device failure          |      |      |      | 1    | 7    |      |      | 1    |      | 1    | 15   |      | 1    | 1    | 1    |       |
| Flap related problem    |      |      |      |      | 1    |      | 1    | 1    |      |      | 1    |      |      |      |      |       |
| Migration               |      |      |      |      |      | 1    |      | 1    |      | 1    | 1    |      |      |      |      |       |
| Hematoma                |      |      |      |      |      |      |      |      |      | 1    | 1    |      | 1    |      |      |       |
| CSF leakage             |      |      |      |      |      |      |      |      |      |      |      |      | 1    |      | 1    |       |
| Misinsertion            |      |      |      |      |      |      | 1    |      |      |      | 1    |      |      |      |      |       |
